# Supplementary material for: Subretinal injection rate of tissue plasminogen activator (tPA) solution and air using a 38-gauge cannula in a retina mimicking model
Source: Research Square preprint supplement (doi:10.21203/rs.3.rs-4006076/v1), 2024-03-14
Supplement: Supplementary file 1 [file 69e55a97ec3461abd0957574.docx]

|  | **No. of subjects** | **Mean** | **Median** | **SD** |
| --- | --- | --- | --- | --- |
| BMF pre-bleb (cm) | 11 | 2.10 | 2.02 | 0.32 |
| Bleb propagation with vector |  | | | |
| BSS (cm) | 11 | 3.11 | 3.06 | 0.36 |
| Air (cm) | 10 | 2.93 | 3.00 | 0.26 |
| **Supplementary Table S1.** Diameter of formed blebs after injection of BMF, BSS, and air. *BMF* blood-mimicking fluid, *BSS* balanced salt solution, *SD* standard deviation | | | | |

|  | **Group 1**  **(N = 5)** | **Group 2**  **(N = 5)** | **Group 3**  **(N = 5)** | **P** | **P**  **1 vs 2** | **P**  **1 vs 3** | **P**  **2 vs 3** |
| --- | --- | --- | --- | --- | --- | --- | --- |
| Pressure to inject  0.4 ml of BSS (psi) | 8 | 12 | 16 |  |  |  |  |
| Injection rate (μl/sec) | 3.17 ± 0.47 | 4.74 ± 0.80 | 7.54 ± 0.75 | .003 | .032 | .008 | 0.08 |
|  | | | | | | | |
| Pressure to inject  1 ml of air (psi) | 2 | 3 | 4 |  |  |  |  |
| Injection rate (μl/sec) | 52.75 ± 9.87 | 78.18 ± 2.97 | 123.63 ± 12.46 | .002 | .008 | .008 | .008 |
| **Supplementary Table S2**. Summary of injection rates among the 3 groups. P indicates the P value comparing the means of 3 groups (Kruskal-Wallis test, statistically significant P < 0.017 by Bonferroni correction). P 1 vs 2, 1 vs 3 and 2 vs 3 denote the P values between groups of the specified number (Post hoc analysis using Mann–Whitney U test).*BSS* balanced salt solution, *psi* pounds per square inch. | | | | | | | |
